# Supplementary material
Source: PubMed Central journal article supplement (PMC4577901)
Supplement: JVI.01142-15_zjv999090807so1.pdf [file JVI.01142-15_zjv999090807so1.pdf]

Early

Mid

Late

Early infection-  
expressed genesLate infection-  
expressed genesMid infection-  
expressed genesEarly infection-  
expressed genes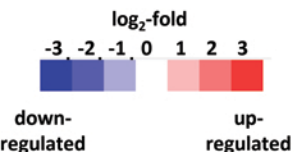

Supplemental Figure 1A

Upregulated genes (69%)

Defense response  
 Inflammatory response  
 Response to wounding  
 Regulation of apoptosis  
 Regulation of cytokines  
 Innate immune response

Downregulated genes (31%)

Regulation of transcription  
 Regulation of signal transduction  
 Growth factor activity

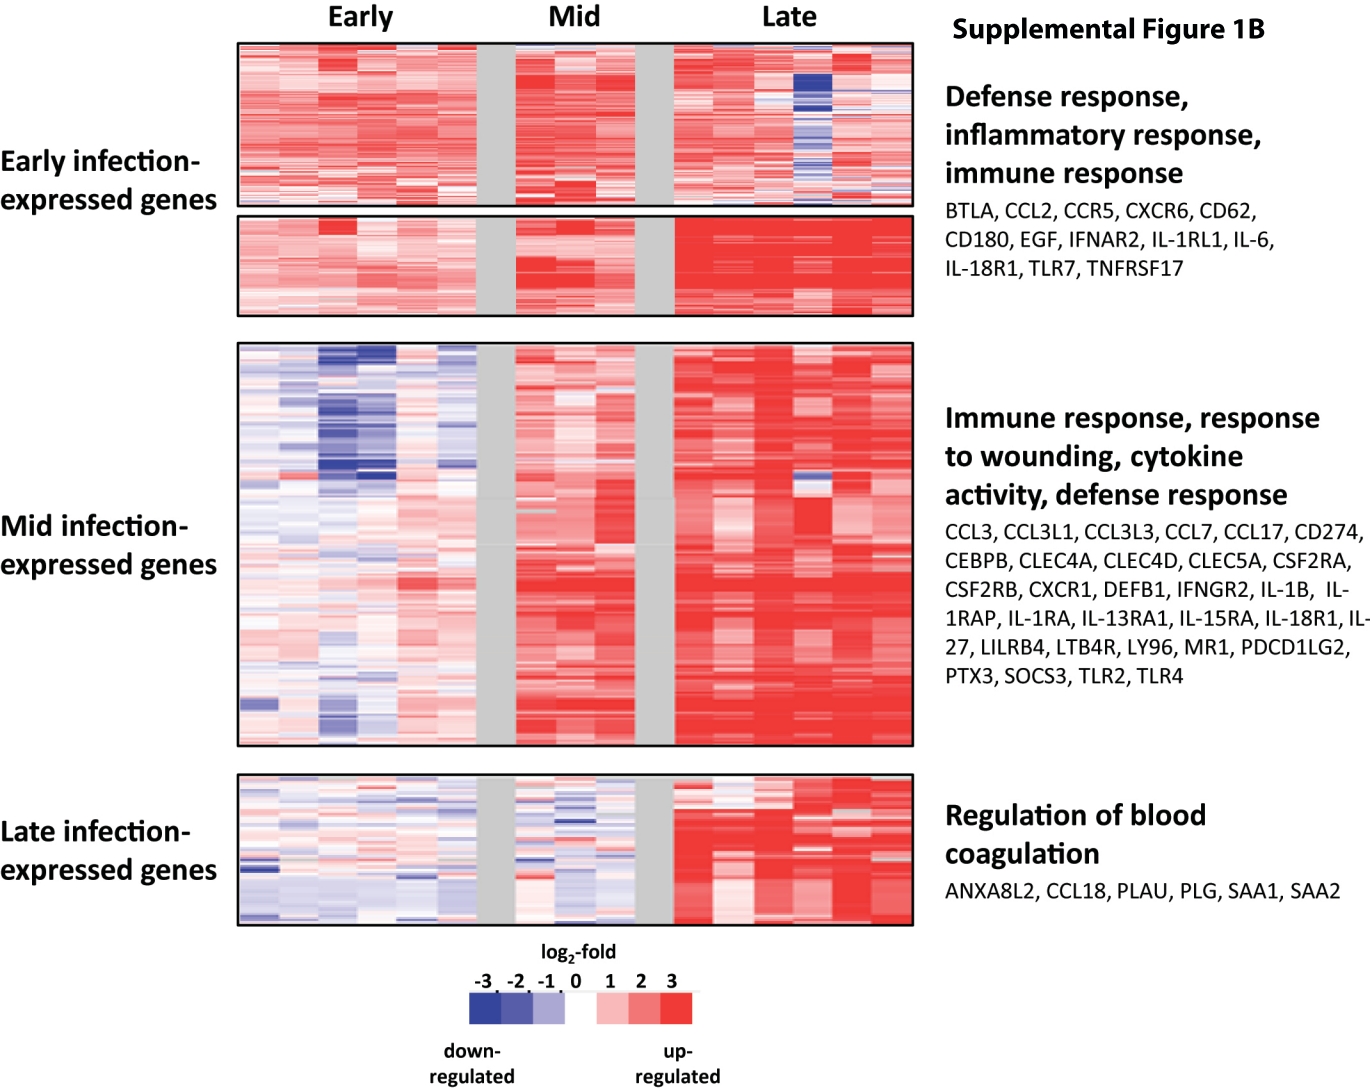

**A**

|       | EARLY (DAY 3) |               |
|-------|---------------|---------------|
|       | Microarray    | Real Time PCR |
| FOSB  | -2            | -5            |
| STAT1 | 3             | 4             |
| IRF7  | 4             | 5             |
| TLR7  | 7             | 3             |
| IFIT2 | 21            | 33            |
| OAS1  | 8             | 15            |
| DDX60 | 4             | 9             |
| ISG15 | 10            | 11            |
| APOL4 | 3             | 6             |
| ARL5B | -2            | 13            |
| NR4A2 | -4            | -29           |
| PARP9 | 3             | 3             |
| HERC6 | 4             | 3             |
| DHX58 | 2             | 3             |

|         | MIDDLE (DAY 5) |               |
|---------|----------------|---------------|
|         | Microarray     | Real Time PCR |
| IL1B    | 3              | 3             |
| IL6     | 8              | 3             |
| IL27    | 17             | 5             |
| SOCS3   | 3              | 2             |
| TNFAIP6 | 20             | 43            |
| RIN2    | 4              | 4             |
| SAMD4A  | 7              | 10            |
| CXCL11  | 3              | 118           |
| CCL23   | 5              | 2             |
| FCGR2A  | 5              | 5             |
| IL4     | 4              | 2             |
| LAP3    | 4              | 3             |

|          | LATE (DAY 9) |               |
|----------|--------------|---------------|
|          | Microarray   | Real Time PCR |
| CD63     | 5            | 24            |
| SIGLEC10 | -2           | -6            |
| CORO2A   | 3            | 7             |

**B**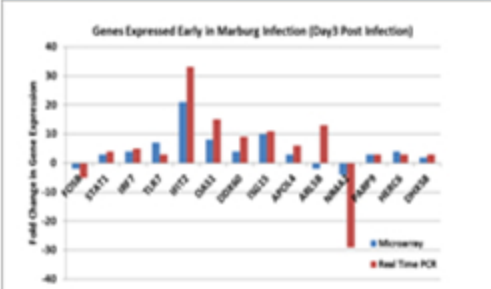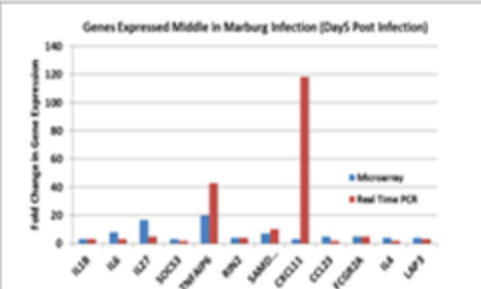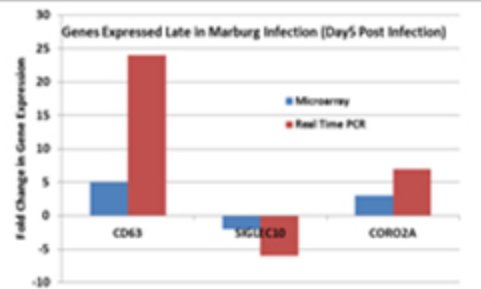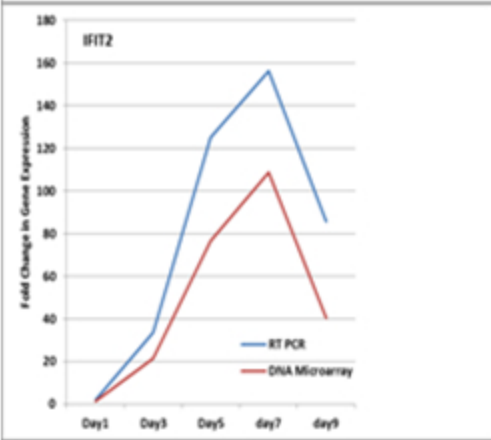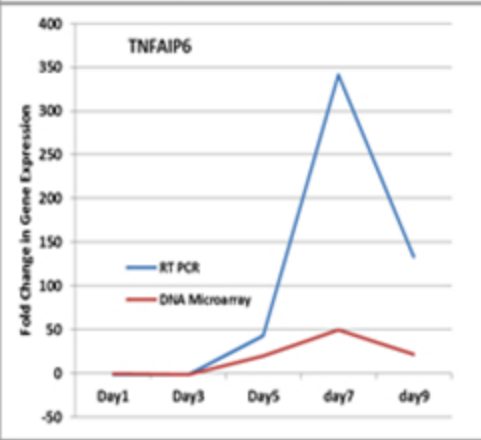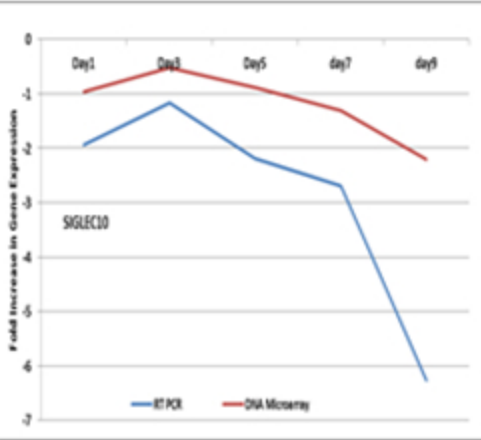

**Figure S1. Temporal changes in gene expression following aerosol exposure to MARV.**

(A) Heatmap illustrating 1213 hierarchically clustered genes that showed at least a 2 log<sub>2</sub>-fold change in the differential gene expression following MARV exposure. Each row in the heatmap represents data from an individual gene, and each column represents the individual PBMC sample taken at a 1,3,5,7 or 9 postexposure (changes in gene expression are relative to the pre-infection control). Samples from the dataset were grouped into early (days 1–3), middle (day 5) and late (days 7-9) stages of infection. Major gene clusters are denoted by the colored vertical bars to the left of the heatmap and are labeled with DAVID-identified significant ( $p$ -value <0.001) functional groups to the right of that cluster. (B) The most significant functional groups (assigned by DAVID,  $p$ -value <0.001) found in major gene clusters are listed to the right of the heatmaps, along with the names of some representative genes. Red and blue colors denote expression levels greater or less than baseline (white), respectively.

**Figure S2. Validation of mRNA changes observed in microarray through rt-PCR.**

A subset of mRNAs were selected for validation with rt-PCR from samples taken early (day 3 PE) during the middle of infection (day 5 PE) or late in infection (day 9 PE). (a) Fold Change in gene expression during early (left), mid (center) and late (right) MARV infection determined by microarray analysis (blue) and rtPCR assay (red). (B) The agreement of microarray and rtPCR gene expression trends throughout the time course of infection is illustrated using three different genes, IFIT2 (an up-regulated gene, left) TNFAIP (an up-regulated gene, center), and SIGLEC10, a down-regulated gene (right). Microarray values are shown in red, rtPCR values in blue.
